# Supplementary material
Source: PubMed Central journal article supplement (PMC7584807)
Supplement: NIHMS1626966-supplement-1.pdf [file NIHMS1626966-supplement-1.pdf]

| SOMAscan Assay ID     | UniProt ID | Target Full Name                                                  | Entrez Gene Symbol | Fold Change HFrEF vs HFpEF | P Value HFrEF vs HFpEF | Fold Change HFrEF vs HFpEF | P Value HFrEF vs HFpEF | Fold Change HFbEF vs HFpEF | P Value HFbEF vs HFpEF | Expression Specificity t0 Heart Proteomics Atlas |
|-----------------------|------------|-------------------------------------------------------------------|--------------------|----------------------------|------------------------|----------------------------|------------------------|----------------------------|------------------------|--------------------------------------------------|
| BMP10.3587.53.2       | O95393     | Bone morphogenetic protein 10                                     | BMP10              | 1.267                      | <b>0.0045</b>          | 1.263                      | <b>0.0012</b>          | 1.003                      | 0.9671                 | Elevated in heart                                |
| CCL18.3044.3.2        | P55774     | C-C motif chemokine 18                                            | CCL18              | 1.065                      | 0.5317                 | 1.195                      | <b>0.0404</b>          | -1.123                     | 0.1944                 | Elevated in heart                                |
| FGF23.3807.1.2        | Q9GZV9     | Fibroblast growth factor 23                                       | FGF23              | 1.517                      | <b>0.0017</b>          | 1.557                      | <b>0.0001</b>          | -1.026                     | 0.8243                 | Elevated in heart                                |
| NPPA.5443.62.2        | P01160     | Atrial natriuretic factor                                         | NPPA               | 1.428                      | <b>0.0000</b>          | 1.443                      | <b>0.0000</b>          | -1.011                     | 0.8854                 | Elevated in heart                                |
| NPPB.7655.11.3        | P16860     | N-terminal pro-BNP                                                | NPPB               | 3.204                      | <b>0.0000</b>          | 4.031                      | <b>0.0000</b>          | -1.258                     | 0.2861                 | Elevated in heart                                |
| TNNI3.5441.67.3       | P19429     | Troponin I, cardiac muscle                                        | TNNI3              | 1.265                      | <b>0.0319</b>          | 1.310                      | <b>0.0046</b>          | -1.036                     | 0.7172                 | Elevated in heart                                |
| ADAMTS13.3175.51.5    | Q76LX8     | A disintegrin and metalloproteinase with thrombospondin motifs 13 | ADAMTS13           | -1.040                     | 0.5894                 | -1.153                     | <b>0.0259</b>          | 1.108                      | 0.1168                 | Elevated in other but expressed in heart         |
| ADM.14115.34.3        | P35318     | Adrenomedullin                                                    | ADM                | -1.117                     | <b>0.0228</b>          | -1.100                     | <b>0.0238</b>          | -1.016                     | 0.7160                 | Elevated in other but expressed in heart         |
| AGT.3484.60.2         | P01019     | Angiotensinogen                                                   | AGT                | -1.167                     | 0.1530                 | -1.243                     | <b>0.0206</b>          | 1.065                      | 0.5118                 | Elevated in other but expressed in heart         |
| AMIGO2.14134.49.3     | Q86SJ2     | Amphoterin-induced protein 2                                      | AMIGO2             | 1.166                      | <b>0.0287</b>          | 1.151                      | <b>0.0206</b>          | 1.013                      | 0.8358                 | Elevated in other but expressed in heart         |
| ANGPTL4.3796.79.2     | Q9BY76     | Angiopoietin-related protein 4                                    | ANGPTL4            | 1.089                      | 0.1580                 | 1.170                      | <b>0.0030</b>          | -1.074                     | 0.1857                 | Elevated in other but expressed in heart         |
| APOA1.2750.3.2        | P02647     | Apolipoprotein A-I                                                | APOA1              | -1.064                     | 0.3584                 | -1.153                     | <b>0.0155</b>          | 1.084                      | 0.1821                 | Elevated in other but expressed in heart         |
| APOD.4712.28.2        | P05090     | Apolipoprotein D                                                  | APOD               | -1.039                     | 0.4438                 | -1.110                     | <b>0.0176</b>          | 1.068                      | 0.1446                 | Elevated in other but expressed in heart         |
| APOE.2418.55.9        | P02649     | Apolipoprotein E                                                  | APOE               | 1.075                      | 0.5764                 | -1.237                     | 0.0579                 | 1.329                      | <b>0.0140</b>          | Elevated in other but expressed in heart         |
| APOE.2937.10.2        | P02649     | Apolipoprotein E (isoform E3)                                     | APOE               | 1.029                      | 0.6446                 | -1.094                     | 0.0969                 | 1.126                      | <b>0.0337</b>          | Elevated in other but expressed in heart         |
| BCAM.2816.50.2        | P50895     | Basal Cell Adhesion Molecule                                      | BCAM               | 1.166                      | <b>0.0255</b>          | 1.068                      | 0.2658                 | 1.091                      | 0.1500                 | Elevated in other but expressed in heart         |
| BCAR3.5262.57.3       | O75815     | Breast cancer anti-estrogen resistance protein 3                  | BCAR3              | 1.095                      | 0.2928                 | 1.163                      | <b>0.0436</b>          | -1.062                     | 0.4307                 | Elevated in other but expressed in heart         |
| BCL2A1.3413.50.2      | Q16548     | Bcl-2-related protein A1                                          | BCL2A1             | -1.087                     | 0.0552                 | -1.085                     | <b>0.0301</b>          | -1.002                     | 0.9654                 | Elevated in other but expressed in heart         |
| BDNF.2421.7.3         | P23560     | Brain-derived neurotrophic factor                                 | BDNF               | -1.135                     | <b>0.0405</b>          | -1.083                     | 0.1344                 | -1.048                     | 0.3927                 | Elevated in other but expressed in heart         |
| BMP1.3348.49.2        | P13497     | Bone morphogenetic protein 1                                      | BMP1               | -1.049                     | 0.5406                 | -1.211                     | <b>0.0054</b>          | 1.154                      | <b>0.0419</b>          | Elevated in other but expressed in heart         |
| BMP6.8459.10.3        | P22004     | Bone morphogenetic protein 6                                      | BMP6               | 1.271                      | <b>0.0059</b>          | 1.186                      | <b>0.0234</b>          | 1.072                      | 0.3658                 | Elevated in other but expressed in heart         |
| BMP7.2972.57.2        | P18075     | Bone morphogenetic protein 7                                      | BMP7               | 1.144                      | <b>0.0446</b>          | 1.115                      | 0.0608                 | 1.026                      | 0.6617                 | Elevated in other but expressed in heart         |
| C1S.3590.8.3          | P09871     | Complement C1s subcomponent                                       | C1S                | -1.055                     | 0.1555                 | -1.088                     | <b>0.0093</b>          | 1.032                      | 0.3413                 | Elevated in other but expressed in heart         |
| C3.4900.8.1           | P01024     | C3a anaphylatoxin                                                 | C3                 | -1.006                     | 0.9322                 | -1.147                     | <b>0.0189</b>          | 1.140                      | <b>0.0286</b>          | Elevated in other but expressed in heart         |
| C6.4127.75.1          | P13671     | Complement component C6                                           | C6                 | 1.127                      | <b>0.0357</b>          | 1.038                      | 0.4422                 | 1.085                      | 0.1052                 | Elevated in other but expressed in heart         |
| C7.2888.49.2          | P10643     | Complement component C7                                           | C7                 | 1.088                      | 0.1833                 | 1.127                      | <b>0.0305</b>          | -1.035                     | 0.5368                 | Elevated in other but expressed in heart         |
| CA3.3799.11.2         | P07451     | Carbonic anhydrase 3                                              | CA3                | -1.272                     | <b>0.0494</b>          | -1.207                     | 0.0745                 | -1.053                     | 0.6322                 | Elevated in other but expressed in heart         |
| CA4.3177.49.2         | P22748     | Carbonic anhydrase 4                                              | CA4                | 1.043                      | 0.5307                 | -1.097                     | 0.1155                 | 1.144                      | <b>0.0262</b>          | Elevated in other but expressed in heart         |
| CASP10.5340.24.3      | Q92851     | Caspase-10                                                        | CASP10             | -1.126                     | <b>0.0057</b>          | -1.109                     | <b>0.0052</b>          | -1.015                     | 0.6951                 | Elevated in other but expressed in heart         |
| CCL14.2900.53.3       | Q16627     | C-C motif chemokine 14                                            | CCL14              | 1.200                      | 0.0687                 | 1.297                      | <b>0.0030</b>          | -1.080                     | 0.3861                 | Elevated in other but expressed in heart         |
| CCL23.2913.1.2        | P55773     | C-C motif chemokine 23                                            | CCL23              | 1.095                      | 0.1900                 | 1.162                      | <b>0.0126</b>          | -1.061                     | 0.3330                 | Elevated in other but expressed in heart         |
| CCL23.3028.36.2       | P55773     | Ck-beta-8-1                                                       | CCL23              | 1.211                      | 0.0531                 | 1.190                      | <b>0.0415</b>          | 1.017                      | 0.8481                 | Elevated in other but expressed in heart         |
| CCL4L1.2781.63.2      | Q8NHW4     | C-C motif chemokine 4-like                                        | CCL4L1             | 1.313                      | <b>0.0027</b>          | 1.269                      | <b>0.0024</b>          | 1.034                      | 0.6722                 | Elevated in other but expressed in heart         |
| CD244.5063.12.2       | Q9BZW8     | Natural killer cell receptor 2B4                                  | CD244              | -1.118                     | <b>0.0355</b>          | 1.017                      | 0.7121                 | -1.137                     | <b>0.0068</b>          | Elevated in other but expressed in heart         |
| CD274.5060.62.3       | Q9NZQ7     | Programmed cell death 1 ligand 1                                  | CD274              | 1.148                      | 0.2462                 | 1.250                      | <b>0.0313</b>          | -1.088                     | 0.4237                 | Elevated in other but expressed in heart         |
| CD33.3166.92.1        | P20138     | Myeloid cell surface antigen CD33                                 | CD33               | 1.241                      | <b>0.0487</b>          | 1.055                      | 0.5676                 | 1.176                      | 0.0961                 | Elevated in other but expressed in heart         |
| CD40LG.3534.14.2      | P29965     | CD40 ligand                                                       | CD40LG             | -1.057                     | 0.5617                 | -1.187                     | <b>0.0380</b>          | 1.123                      | 0.1698                 | Elevated in other but expressed in heart         |
| CKB.CKM.3714.49.2     | P12277     | Creatine kinase M-type:Creatine kinase B-type heterodimer         | CKB                | -1.348                     | 0.1529                 | -1.520                     | <b>0.0212</b>          | 1.127                      | 0.5188                 | Elevated in other but expressed in heart         |
| CKM.2670.67.4         | P06732     | Creatine kinase M-type                                            | CKM                | -1.176                     | 0.2233                 | -1.333                     | <b>0.0130</b>          | 1.134                      | 0.2885                 | Elevated in other but expressed in heart         |
| CNDP1.5456.59.2       | Q96KN2     | Beta-Ala-His dipeptidase                                          | CNDP1              | -1.050                     | 0.6996                 | -1.275                     | <b>0.0282</b>          | 1.214                      | 0.0878                 | Elevated in other but expressed in heart         |
| CNTN4.3298.52.2       | Q8IHWV2    | Contactin-4                                                       | CNTN4              | 1.085                      | 0.1257                 | -1.016                     | 0.7262                 | 1.103                      | <b>0.0400</b>          | Elevated in other but expressed in heart         |
| COL18A1.2201.17.6     | P39060     | Endostatin                                                        | COL18A1            | 1.112                      | 0.1320                 | 1.160                      | <b>0.0156</b>          | -1.043                     | 0.5017                 | Elevated in other but expressed in heart         |
| COL8A1.4807.13.3      | P27658     | Collagen alpha-1(VIII) chain                                      | COL8A1             | -1.013                     | 0.9303                 | -1.283                     | <b>0.0459</b>          | 1.267                      | 0.0652                 | Elevated in other but expressed in heart         |
| COTL1.4905.63.1       | Q14019     | Coactosin-like protein                                            | COTL1              | 1.058                      | 0.2429                 | -1.033                     | 0.4382                 | 1.093                      | <b>0.0399</b>          | Elevated in other but expressed in heart         |
| CST7.3302.58.1        | O76096     | Cystatin-F                                                        | CST7               | -1.079                     | 0.4917                 | 1.169                      | 0.1031                 | -1.261                     | <b>0.0191</b>          | Elevated in other but expressed in heart         |
| CTSC.3178.5.2         | P53634     | Dipeptidyl peptidase 1                                            | CTSC               | -1.038                     | 0.4272                 | -1.094                     | <b>0.0269</b>          | 1.054                      | 0.2039                 | Elevated in other but expressed in heart         |
| CTSG.2431.17.3        | P08311     | Cathepsin G                                                       | CTSG               | 1.070                      | 0.4435                 | 1.191                      | <b>0.0232</b>          | -1.113                     | 0.1747                 | Elevated in other but expressed in heart         |
| CXCL3.CXCL2.2986.49.2 | P19876     | Gro-beta/gamma                                                    | CXCL3              | -1.156                     | 0.1489                 | -1.195                     | <b>0.0412</b>          | 1.033                      | 0.7120                 | Elevated in other but expressed in heart         |
| CXCL8.3447.64.2       | P10145     | Interleukin-8                                                     | CXCL8              | 1.184                      | 0.0638                 | 1.233                      | <b>0.0083</b>          | -1.041                     | 0.6195                 | Elevated in other but expressed in heart         |
| ECE1.3611.70.4        | P42892     | Endothelin-converting enzyme 1                                    | ECE1               | -1.026                     | 0.7148                 | -1.131                     | <b>0.0462</b>          | 1.102                      | 0.1254                 | Elevated in other but expressed in heart         |
| EGF.5509.7.3          | P01133     | Epidermal growth factor                                           | EGF                | -1.155                     | <b>0.0421</b>          | -1.150                     | <b>0.0225</b>          | -1.004                     | 0.9492                 | Elevated in other but expressed in heart         |
| EGFR.2677.1.1         | P00533     | Epidermal growth factor receptor                                  | EGFR               | 1.057                      | 0.3048                 | -1.045                     | 0.3523                 | 1.104                      | <b>0.0407</b>          | Elevated in other but expressed in heart         |

|                        |        |                                                           |           |        |               |        |               |        |               |                                          |
|------------------------|--------|-----------------------------------------------------------|-----------|--------|---------------|--------|---------------|--------|---------------|------------------------------------------|
| ENO2.10339.48.3        | P09104 | Gamma-enolase                                             | ENO2      | -1.029 | 0.7218        | -1.181 | <b>0.0164</b> | 1.148  | 0.0524        | Elevated in other but expressed in heart |
| ENTPD5.4437.56.3       | O75356 | Ectonucleoside triphosphate diphosphohydrolase 5          | ENTPD5    | -1.039 | 0.5193        | -1.133 | <b>0.0166</b> | 1.090  | 0.1058        | Elevated in other but expressed in heart |
| ESAM.2981.9.3          | Q96AP7 | Endothelial cell-selective adhesion molecule              | ESAM      | -1.151 | <b>0.0088</b> | -1.071 | 0.1347        | -1.074 | 0.1316        | Elevated in other but expressed in heart |
| ESM1.3805.16.2         | Q9NQ30 | Endothelial cell-specific molecule 1                      | ESM1      | 1.182  | 0.0968        | 1.253  | <b>0.0100</b> | -1.060 | 0.5130        | Elevated in other but expressed in heart |
| F10.3077.66.2          | P00742 | Coagulation factor Xa                                     | F10       | -1.238 | <b>0.0091</b> | -1.234 | <b>0.0031</b> | -1.003 | 0.9671        | Elevated in other but expressed in heart |
| F10.4878.3.1           | P00742 | Coagulation Factor X                                      | F10       | -1.250 | <b>0.0064</b> | -1.228 | <b>0.0038</b> | -1.018 | 0.8063        | Elevated in other but expressed in heart |
| F5.4906.35.1           | P12259 | Coagulation Factor V                                      | F5        | -1.053 | 0.1918        | -1.087 | <b>0.0167</b> | 1.031  | 0.3817        | Elevated in other but expressed in heart |
| FCGR2A.3309.2.2        | P12318 | Low affinity immunoglobulin gamma Fc region receptor II-a | FCGR2A    | -2.087 | <b>0.0362</b> | -1.790 | 0.0551        | -1.166 | 0.6211        | Elevated in other but expressed in heart |
| FCN1.3613.62.1         | O00602 | Ficolin-1                                                 | FCN1      | 1.205  | <b>0.0194</b> | 1.019  | 0.7825        | 1.182  | <b>0.0183</b> | Elevated in other but expressed in heart |
| FGF9.2764.20.2         | P31371 | Fibroblast growth factor 9                                | FGF9      | 1.177  | <b>0.0431</b> | 1.146  | 0.0502        | 1.027  | 0.7094        | Elevated in other but expressed in heart |
| FIGF.13098.93.3        | Q43915 | Vascular endothelial growth factor D                      | FIGF      | 1.067  | 0.3950        | 1.141  | <b>0.0479</b> | -1.069 | 0.3292        | Elevated in other but expressed in heart |
| FLRT3.13123.3.3        | Q9NZU0 | Leucine-rich repeat transmembrane protein FLRT3           | FLRT3     | 1.222  | <b>0.0133</b> | 1.183  | <b>0.0161</b> | 1.032  | 0.6548        | Elevated in other but expressed in heart |
| FN1.3435.53.2          | P02751 | Fibronectin Fragment 4                                    | FN1       | 1.110  | <b>0.0264</b> | 1.055  | 0.1831        | 1.052  | 0.2253        | Elevated in other but expressed in heart |
| FSTL3.3438.10.2        | O95633 | Follistatin-related protein 3                             | FSTL3     | 1.125  | 0.1870        | 1.192  | <b>0.0237</b> | -1.059 | 0.4669        | Elevated in other but expressed in heart |
| FUT5.4549.78.2         | Q11128 | Alpha-(1,3)-fucosyltransferase 5                          | FUT5      | 1.412  | <b>0.0006</b> | 1.201  | <b>0.0331</b> | 1.176  | 0.0674        | Elevated in other but expressed in heart |
| GAS1.5463.22.3         | P54826 | Growth arrest-specific protein 1                          | GAS1      | 1.051  | 0.3476        | 1.131  | <b>0.0079</b> | -1.076 | 0.1221        | Elevated in other but expressed in heart |
| GDF11.MSTN.2765.4.3    | O95390 | Growth/differentiation factor 11/8                        | GDF11     | -1.102 | 0.1911        | -1.158 | <b>0.0230</b> | 1.051  | 0.4519        | Elevated in other but expressed in heart |
| GDF15.4374.45.2        | Q99988 | Growth/differentiation factor 15                          | GDF15     | 1.341  | <b>0.0328</b> | 1.579  | <b>0.0002</b> | -1.177 | 0.1807        | Elevated in other but expressed in heart |
| GHR.2948.58.2          | P10912 | Growth hormone receptor                                   | GHR       | -1.009 | 0.9319        | -1.233 | <b>0.0173</b> | 1.222  | <b>0.0265</b> | Elevated in other but expressed in heart |
| GPC3.4842.62.2         | P51654 | Glypican-3                                                | GPC3      | 1.234  | <b>0.0225</b> | 1.089  | 0.2805        | 1.133  | 0.1268        | Elevated in other but expressed in heart |
| GPC5.4991.12.1         | P78333 | Glypican-5                                                | GPC5      | 1.094  | 0.2386        | -1.088 | 0.2019        | 1.191  | <b>0.0109</b> | Elevated in other but expressed in heart |
| HAMP.3504.58.2         | P81172 | Hepcidin                                                  | HAMP      | -1.674 | <b>0.0423</b> | -1.315 | 0.2106        | -1.273 | 0.2832        | Elevated in other but expressed in heart |
| HAVCR2.5134.52.2       | Q8TDQ0 | Hepatitis A virus cellular receptor 2                     | HAVCR2    | 1.074  | 0.4006        | 1.160  | <b>0.0439</b> | -1.080 | 0.3065        | Elevated in other but expressed in heart |
| HFE2.3332.57.1         | Q6ZVN8 | Hemojuvelin                                               | HFE2      | -1.103 | 0.0943        | -1.182 | <b>0.0011</b> | 1.071  | 0.1860        | Elevated in other but expressed in heart |
| HIST1H3A.14146.92.3    | P68431 | Histone H3.1                                              | HIST1H3A  | 1.077  | 0.3659        | 1.196  | <b>0.0126</b> | -1.110 | 0.1544        | Elevated in other but expressed in heart |
| HIST2H2BE.14143.8.3    | Q16778 | Histone H2B type 2-E                                      | HIST2H2BE | 1.416  | <b>0.0137</b> | 1.425  | <b>0.0039</b> | -1.006 | 0.9605        | Elevated in other but expressed in heart |
| HPGD.4995.16.1         | P15428 | 15-hydroxyprostaglandin dehydrogenase [NAD(+)]            | HPGD      | -1.110 | 0.0645        | -1.126 | <b>0.0155</b> | 1.014  | 0.7759        | Elevated in other but expressed in heart |
| HSPA1A.4124.24.2       | PODMV8 | Heat shock 70 kDa protein 1A                              | HSPA1A    | 1.242  | <b>0.0061</b> | 1.153  | <b>0.0363</b> | 1.077  | 0.2870        | Elevated in other but expressed in heart |
| IBSP.3415.61.2         | P21815 | Bone sialoprotein 2                                       | IBSP      | 1.182  | 0.2000        | 1.388  | <b>0.0041</b> | -1.174 | 0.1680        | Elevated in other but expressed in heart |
| ICAM5.5124.69.3        | Q9UMF0 | Intercellular adhesion molecule 5                         | ICAM5     | 1.170  | <b>0.0241</b> | 1.155  | <b>0.0163</b> | 1.012  | 0.8431        | Elevated in other but expressed in heart |
| IGFBP2.8469.41.3       | P18065 | Insulin-like growth factor-binding protein 2              | IGFBP2    | 1.075  | 0.6026        | 1.267  | <b>0.0494</b> | -1.179 | 0.1830        | Elevated in other but expressed in heart |
| IL10RA.10344.334.3     | Q13651 | Interleukin-10 receptor subunit alpha                     | IL10RA    | -1.061 | 0.0911        | -1.106 | <b>0.0011</b> | 1.042  | 0.1870        | Elevated in other but expressed in heart |
| IL12RB2.3815.14.1      | Q99665 | Interleukin-12 receptor subunit beta-2                    | IL12RB2   | -1.294 | <b>0.0252</b> | -1.149 | 0.1626        | -1.127 | 0.2421        | Elevated in other but expressed in heart |
| IL16.2774.10.3         | Q14005 | Interleukin-16                                            | IL16      | -1.127 | <b>0.0222</b> | -1.072 | 0.1233        | -1.052 | 0.2783        | Elevated in other but expressed in heart |
| IL1RL1.4234.8.2        | Q01638 | Interleukin-1 receptor-like 1                             | IL1RL1    | 1.413  | <b>0.0049</b> | 1.497  | <b>0.0002</b> | -1.060 | 0.5918        | Elevated in other but expressed in heart |
| IL5RA.4491.4.2         | Q01344 | Interleukin-5 receptor subunit alpha                      | IL5RA     | 1.259  | <b>0.0152</b> | 1.160  | 0.0687        | 1.085  | 0.3318        | Elevated in other but expressed in heart |
| ITGA2B.ITGB3.8488.33.3 | P08514 | Integrin alpha-IIb: beta-3 complex                        | ITGA2B    | -1.102 | 0.3073        | 1.085  | 0.3249        | -1.196 | <b>0.0364</b> | Elevated in other but expressed in heart |
| KIF23.5228.25.2        | Q02241 | Kinesin-like protein KIF23                                | KIF23     | -1.179 | <b>0.0349</b> | -1.099 | 0.1602        | -1.073 | 0.3105        | Elevated in other but expressed in heart |
| KIRREL3.4557.61.2      | Q8IZU9 | Kin of IRRE-like protein 3                                | KIRREL3   | -1.089 | <b>0.0204</b> | -1.079 | <b>0.0176</b> | -1.010 | 0.7646        | Elevated in other but expressed in heart |
| KLRF1.5098.79.3        | Q9NZS2 | Killer cell lectin-like receptor subfamily F member 1     | KLRF1     | -1.087 | 0.2556        | -1.161 | <b>0.0199</b> | 1.068  | 0.3175        | Elevated in other but expressed in heart |
| KLRK1.3056.11.1        | P26718 | NKG2-D type II integral membrane protein                  | KLRK1     | -1.075 | 0.2908        | 1.099  | 0.1121        | -1.181 | <b>0.0067</b> | Elevated in other but expressed in heart |
| L1CAM.4246.40.2        | P32004 | Neural cell adhesion molecule L1                          | L1CAM     | -1.120 | 0.0848        | -1.140 | <b>0.0221</b> | 1.017  | 0.7673        | Elevated in other but expressed in heart |
| LCK.3452.17.2          | P06239 | Tyrosine-protein kinase Lck                               | LCK       | 1.053  | 0.4241        | 1.143  | <b>0.0170</b> | -1.086 | 0.1513        | Elevated in other but expressed in heart |
| LIN7B.4238.4.2         | Q9HAP6 | Protein lin-7 homolog B                                   | LIN7B     | -1.111 | <b>0.0358</b> | -1.057 | 0.2012        | -1.051 | 0.2603        | Elevated in other but expressed in heart |
| LRP1B.7640.29.3        | Q9NZR2 | Low-density lipoprotein receptor-related protein 1B       | LRP1B     | -1.016 | 0.7901        | -1.141 | <b>0.0106</b> | 1.123  | <b>0.0284</b> | Elevated in other but expressed in heart |
| LY86.3623.84.4         | O95711 | Lymphocyte antigen 86                                     | LY86      | -1.086 | <b>0.0426</b> | -1.055 | 0.1248        | -1.029 | 0.4277        | Elevated in other but expressed in heart |
| MAPK12.5005.4.1        | P53778 | Mitogen-activated protein kinase 12                       | MAPK12    | -1.098 | 0.1419        | -1.118 | <b>0.0446</b> | 1.018  | 0.7580        | Elevated in other but expressed in heart |
| MMP17.2838.53.1        | Q9ULZ9 | Matrix metalloproteinase-17                               | MMP17     | 1.061  | 0.4317        | 1.163  | <b>0.0220</b> | -1.096 | 0.1754        | Elevated in other but expressed in heart |
| MSLN.3893.64.1         | Q13421 | Mesothelin                                                | MSLN      | -1.032 | 0.6448        | -1.124 | <b>0.0455</b> | 1.090  | 0.1522        | Elevated in other but expressed in heart |
| NAAA.3173.49.2         | Q02083 | N-acylglutamine-hydrolyzing acid amidase                  | NAAA      | -1.322 | <b>0.0207</b> | -1.223 | 0.0537        | -1.081 | 0.4637        | Elevated in other but expressed in heart |
| NLGN4X.5357.60.3       | Q8N0W4 | Neurologin-4, X-linked                                    | NLGN4X    | 1.134  | <b>0.0455</b> | 1.123  | <b>0.0332</b> | 1.010  | 0.8599        | Elevated in other but expressed in heart |
| NOV.2737.22.2          | P48745 | Protein NOV homolog                                       | NOV       | 1.133  | <b>0.0460</b> | 1.058  | 0.2914        | 1.070  | 0.2209        | Elevated in other but expressed in heart |
| NTF3.4145.58.2         | P20783 | Neurotrophin-3                                            | NTF3      | 1.213  | <b>0.0118</b> | 1.204  | <b>0.0053</b> | 1.008  | 0.9117        | Elevated in other but expressed in heart |
| PAPPA.4148.49.2        | Q13219 | Pappalysin-1                                              | PAPPA     | 1.221  | 0.0696        | 1.295  | <b>0.0069</b> | -1.061 | 0.5464        | Elevated in other but expressed in heart |
| PDE2A.5246.64.3        | O00408 | cGMP-dependent 3',5'-cyclic phosphodiesterase             | PDE2A     | -1.113 | <b>0.0427</b> | -1.069 | 0.1461        | -1.042 | 0.3831        | Elevated in other but expressed in heart |

|                    |        |                                                                      |          |        |               |        |               |        |               |                                                                 |
|--------------------|--------|----------------------------------------------------------------------|----------|--------|---------------|--------|---------------|--------|---------------|-----------------------------------------------------------------|
| PLA2G2A.2692.74.2  | P14555 | Phospholipase A2, membrane associated                                | PLA2G2A  | 1.534  | <b>0.0010</b> | 1.471  | <b>0.0006</b> | 1.043  | 0.7103        | Elevated in other but expressed in heart                        |
| PLAUR.2652.15.1    | Q03405 | Urokinase plasminogen activator surface receptor                     | PLAUR    | 1.166  | 0.0562        | 1.182  | <b>0.0165</b> | -1.014 | 0.8469        | Elevated in other but expressed in heart                        |
| POR.2731.29.2      | P16435 | NADPH-cytochrome P450 reductase                                      | POR      | 1.240  | <b>0.0082</b> | 1.085  | 0.2425        | 1.143  | 0.0643        | Elevated in other but expressed in heart                        |
| PROK1.2247.20.11   | P58294 | Prokineticin-1                                                       | PROK1    | -1.151 | <b>0.0323</b> | -1.041 | 0.4738        | -1.105 | 0.0862        | Elevated in other but expressed in heart                        |
| PROS1.2700.56.2    | P07225 | Vitamin K-dependent protein S                                        | PROS1    | -1.198 | <b>0.0049</b> | -1.168 | <b>0.0051</b> | -1.025 | 0.6574        | Elevated in other but expressed in heart                        |
| RAD51.2871.73.2    | Q06609 | DNA repair protein RAD51 homolog 1                                   | RAD51    | 1.046  | 0.4288        | -1.065 | 0.2042        | 1.114  | <b>0.0347</b> | Elevated in other but expressed in heart                        |
| RET.3220.40.2      | P07949 | Proto-oncogene tyrosine-protein kinase receptor Ret                  | RET      | -1.040 | 0.7183        | -1.236 | <b>0.0236</b> | 1.189  | 0.0715        | Elevated in other but expressed in heart                        |
| ROBO2.5116.62.2    | Q9HCK4 | Roundabout homolog 2                                                 | ROBO2    | 1.122  | <b>0.0380</b> | 1.070  | 0.1543        | 1.048  | 0.3391        | Elevated in other but expressed in heart                        |
| ROBO3.5117.14.3    | Q96MS0 | Roundabout homolog 3                                                 | ROBO3    | -1.157 | <b>0.0108</b> | 1.007  | 0.8860        | -1.165 | <b>0.0028</b> | Elevated in other but expressed in heart                        |
| RSPO4.8464.31.3    | Q210M5 | R-spondin-4                                                          | RSPO4    | 1.148  | 0.1020        | 1.321  | <b>0.0002</b> | -1.150 | 0.0631        | Elevated in other but expressed in heart                        |
| SCT.3728.52.2      | P09683 | Secretin                                                             | SCT      | -1.099 | <b>0.0209</b> | -1.069 | 0.0586        | -1.028 | 0.4438        | Elevated in other but expressed in heart                        |
| SEMA6B.5121.3.2    | Q9H3T3 | Semaphorin-6B                                                        | SEMA6B   | 1.177  | <b>0.0340</b> | 1.143  | <b>0.0441</b> | 1.030  | 0.6673        | Elevated in other but expressed in heart                        |
| SERPINA1.3580.25.8 | P01009 | Alpha-1-antitrypsin                                                  | SERPINA1 | -1.061 | 0.4487        | 1.105  | 0.1420        | -1.172 | <b>0.0235</b> | Elevated in other but expressed in heart                        |
| SERPINA3.2879.9.2  | P01011 | Alpha-1-antichymotrypsin                                             | SERPINA3 | -1.005 | 0.8249        | 1.045  | <b>0.0388</b> | -1.050 | <b>0.0243</b> | Elevated in other but expressed in heart                        |
| SERPINA3.4153.11.2 | P01011 | Alpha-1-antichymotrypsin complex                                     | SERPINA3 | 1.093  | 0.2852        | 1.243  | <b>0.0027</b> | -1.138 | 0.0809        | Elevated in other but expressed in heart                        |
| SERPINE2.3217.74.2 | P07093 | Glia-derived nexin                                                   | SERPINE2 | -1.127 | 0.1539        | 1.033  | 0.6513        | -1.164 | <b>0.0420</b> | Elevated in other but expressed in heart                        |
| SIGLEC7.2742.68.2  | Q9Y286 | Sialic acid-binding Ig-like lectin 7                                 | SIGLEC7  | 1.221  | <b>0.0014</b> | 1.126  | <b>0.0272</b> | 1.084  | 0.1432        | Elevated in other but expressed in heart                        |
| SLAMF6.5128.53.3   | Q96DU3 | SLAM family member 6                                                 | SLAMF6   | 1.145  | <b>0.0281</b> | 1.132  | <b>0.0207</b> | 1.012  | 0.8275        | Elevated in other but expressed in heart                        |
| SLPI.4413.3.2      | P03973 | Antileukoproteinase                                                  | SLPI     | 1.166  | <b>0.0358</b> | 1.134  | <b>0.0464</b> | 1.028  | 0.6697        | Elevated in other but expressed in heart                        |
| SPOCK2.5491.12.3   | Q92563 | Testican-2                                                           | SPOCK2   | 1.263  | <b>0.0008</b> | 1.124  | <b>0.0497</b> | 1.123  | 0.0590        | Elevated in other but expressed in heart                        |
| STC1.4930.21.1     | P52823 | Stanniocalcin-1                                                      | STC1     | 1.149  | <b>0.0256</b> | 1.085  | 0.1288        | 1.059  | 0.2971        | Elevated in other but expressed in heart                        |
| TF.4162.54.2       | P02787 | Serotransferrin                                                      | TF       | 1.024  | 0.2705        | 1.050  | <b>0.0089</b> | -1.026 | 0.1855        | Elevated in other but expressed in heart                        |
| THBS2.3339.33.1    | P35442 | Thrombospondin-2                                                     | THBS2    | 1.720  | <b>0.0026</b> | 1.843  | <b>0.0001</b> | -1.072 | 0.6610        | Elevated in other but expressed in heart                        |
| TIMP1.2211.9.6     | P01033 | Metalloproteinase inhibitor 1                                        | TIMP1    | 1.137  | 0.0947        | 1.245  | <b>0.0011</b> | -1.095 | 0.1824        | Elevated in other but expressed in heart                        |
| TIMP2.2278.61.4    | P16035 | Metalloproteinase inhibitor 2                                        | TIMP2    | 1.045  | 0.4370        | 1.129  | <b>0.0131</b> | -1.081 | 0.1204        | Elevated in other but expressed in heart                        |
| TNC.4155.3.2       | P24821 | Tenascin                                                             | TNC      | 1.293  | <b>0.0064</b> | 1.339  | <b>0.0004</b> | -1.036 | 0.6715        | Elevated in other but expressed in heart                        |
| TNF.5936.53.3      | P01375 | Tumor necrosis factor                                                | TNF      | -1.154 | <b>0.0378</b> | -1.073 | 0.2379        | -1.076 | 0.2316        | Elevated in other but expressed in heart                        |
| TNFRSF9.2598.9.3   | Q07011 | Tumor necrosis factor receptor superfamily member 9                  | TNFRSF9  | 1.153  | 0.0850        | 1.233  | <b>0.0036</b> | -1.070 | 0.3556        | Elevated in other but expressed in heart                        |
| TNFSF13B.3059.50.2 | Q9Y275 | Tumor necrosis factor ligand superfamily member 13B                  | TNFSF13B | 1.218  | <b>0.0148</b> | 1.067  | 0.3537        | 1.142  | 0.0645        | Elevated in other but expressed in heart                        |
| TNFSF18.2708.54.2  | Q9UNG2 | Tumor necrosis factor ligand superfamily member 18                   | TNFSF18  | -1.056 | 0.2420        | -1.094 | <b>0.0266</b> | 1.036  | 0.3940        | Elevated in other but expressed in heart                        |
| TNFSF8.3421.54.2   | P32971 | Tumor necrosis factor ligand superfamily member 8                    | TNFSF8   | 1.111  | <b>0.0313</b> | 1.049  | 0.2532        | 1.059  | 0.1872        | Elevated in other but expressed in heart                        |
| TPM2.4472.5.2      | P07951 | Tropomyosin beta chain                                               | TPM2     | -1.040 | 0.5100        | -1.109 | <b>0.0427</b> | 1.067  | 0.2160        | Elevated in other but expressed in heart                        |
| TYRO3.2611.72.2    | Q06418 | Tyrosine-protein kinase receptor TYRO3                               | TYRO3    | 1.053  | 0.2153        | -1.040 | 0.2756        | 1.095  | <b>0.0149</b> | Elevated in other but expressed in heart                        |
| VEGFC.3132.1.1     | P49767 | Vascular endothelial growth factor C                                 | VEGFC    | -1.153 | <b>0.0240</b> | -1.029 | 0.5966        | -1.120 | <b>0.0426</b> | Elevated in other but expressed in heart                        |
| VIP.3522.57.1      | P01282 | Vasoactive Intestinal Peptide                                        | VIP      | -1.263 | <b>0.0045</b> | -1.078 | 0.2853        | -1.172 | <b>0.0296</b> | Elevated in other but expressed in heart                        |
| VTN.13125.45.3     | P04004 | Vitronectin                                                          | VTN      | 1.075  | 0.5108        | -1.151 | 0.1407        | 1.238  | <b>0.0308</b> | Elevated in other but expressed in heart                        |
| VWF.3050.7.2       | P04275 | von Willebrand factor                                                | VWF      | 1.218  | 0.0548        | 1.421  | <b>0.0001</b> | -1.167 | 0.0910        | Elevated in other but expressed in heart                        |
| AGER.4125.52.2     | Q15109 | Advanced glycosylation end product-specific receptor, soluble        | AGER     | 1.223  | 0.1660        | 1.348  | <b>0.0182</b> | -1.102 | 0.4522        | Not expressed in heart or expressed with low tissue specificity |
| AHSG.3581.53.3     | P02765 | Alpha-2-HS-glycoprotein                                              | AHSG     | -1.020 | 0.7215        | -1.105 | <b>0.0369</b> | 1.084  | 0.1024        | Not expressed in heart or expressed with low tissue specificity |
| AKT2.5360.9.2      | P31751 | RAC-beta serine/threonine-protein kinase                             | AKT2     | -1.138 | 0.1354        | -1.176 | <b>0.0316</b> | 1.033  | 0.6743        | Not expressed in heart or expressed with low tissue specificity |
| ANGPT2.2602.2.2    | O15123 | Angiotensinogen-converting enzyme 2                                  | ANGPT2   | 1.329  | <b>0.0105</b> | 1.517  | <b>0.0000</b> | -1.142 | 0.1773        | Not expressed in heart or expressed with low tissue specificity |
| APCS.2474.54.5     | P02743 | Serum amyloid P-component                                            | APCS     | -1.131 | 0.0575        | -1.178 | <b>0.0038</b> | 1.041  | 0.4831        | Not expressed in heart or expressed with low tissue specificity |
| ARSA.3583.54.4     | P15289 | Arylsulfatase A                                                      | ARSA     | -1.084 | 0.2587        | -1.237 | <b>0.0007</b> | 1.141  | <b>0.0395</b> | Not expressed in heart or expressed with low tissue specificity |
| ASAH2.3212.30.3    | Q9NR71 | Neutral ceramidase                                                   | ASAH2    | -1.212 | 0.1319        | -1.282 | <b>0.0249</b> | 1.058  | 0.6188        | Not expressed in heart or expressed with low tissue specificity |
| ASGR1.5452.71.3    | P07306 | Asialoglycoprotein receptor 1                                        | ASGR1    | 1.269  | <b>0.0136</b> | 1.103  | 0.2366        | 1.151  | 0.1015        | Not expressed in heart or expressed with low tissue specificity |
| B2M.3485.28.2      | P61769 | Beta-2-microglobulin                                                 | B2M      | 1.017  | 0.8655        | 1.205  | <b>0.0339</b> | -1.184 | 0.0609        | Not expressed in heart or expressed with low tissue specificity |
| C1QBP.4967.1.1     | Q07021 | Complement component 1 Q subcomponent-binding protein, mitochondrial | C1QBP    | -1.036 | 0.2724        | -1.081 | <b>0.0057</b> | 1.044  | 0.1400        | Not expressed in heart or expressed with low tissue specificity |
| C5.C6.4482.66.2    | P01031 | Complement C5b-C6 complex                                            | C5       | 1.052  | 0.1940        | -1.020 | 0.5630        | 1.073  | <b>0.0442</b> | Not expressed in heart or expressed with low tissue specificity |
| C9.3060.43.2       | P02748 | Complement component C9                                              | C9       | 1.046  | 0.3697        | 1.093  | <b>0.0417</b> | -1.045 | 0.3269        | Not expressed in heart or expressed with low tissue specificity |
| CA9.3798.71.1      | Q16790 | Carbonic anhydrase 9                                                 | CA9      | 1.235  | <b>0.0375</b> | 1.190  | <b>0.0473</b> | 1.038  | 0.6803        | Not expressed in heart or expressed with low tissue specificity |
| CALR.5264.65.3     | P27797 | Calreticulin                                                         | CALR     | -1.166 | <b>0.0326</b> | -1.039 | 0.5403        | -1.123 | 0.0700        | Not expressed in heart or expressed with low tissue specificity |
| CCL15.3509.1.1     | Q16663 | C-C motif chemokine 15                                               | CCL15    | 1.110  | 0.2336        | 1.163  | <b>0.0471</b> | -1.048 | 0.5490        | Not expressed in heart or expressed with low tissue specificity |
| CCL22.3508.78.3    | O00626 | C-C motif chemokine 22                                               | CCL22    | -1.059 | 0.5192        | -1.184 | <b>0.0285</b> | 1.118  | 0.1571        | Not expressed in heart or expressed with low tissue specificity |
| CFD.2946.52.2      | P00746 | Complement factor D                                                  | CFD      | 1.005  | 0.9278        | 1.113  | <b>0.0323</b> | -1.107 | <b>0.0476</b> | Not expressed in heart or expressed with low tissue specificity |
| CFHR5.3666.17.4    | Q9BXR6 | Complement factor H-related protein 5                                | CFHR5    | -1.060 | 0.4092        | -1.160 | <b>0.0154</b> | 1.095  | 0.1493        | Not expressed in heart or expressed with low tissue specificity |

|                    |        |                                                               |          |        |               |        |               |        |               |                                                                 |
|--------------------|--------|---------------------------------------------------------------|----------|--------|---------------|--------|---------------|--------|---------------|-----------------------------------------------------------------|
| CGA.TSHB.3521.16.2 | P01215 | Thyroid Stimulating Hormone                                   | CGA      | 1.334  | <b>0.0204</b> | -1.039 | 0.7225        | 1.385  | <b>0.0034</b> | Not expressed in heart or expressed with low tissue specificity |
| CHRDL1.3362.61.2   | Q9BU40 | Chordin-like protein 1                                        | CHRDL1   | 1.102  | 0.1369        | 1.134  | <b>0.0260</b> | -1.029 | 0.6154        | Not expressed in heart or expressed with low tissue specificity |
| CLC.11094.104.3    | Q05315 | Galectin-10                                                   | CLC      | -1.119 | <b>0.0178</b> | -1.078 | 0.0646        | -1.037 | 0.3794        | Not expressed in heart or expressed with low tissue specificity |
| CRP.4337.49.2      | P02741 | C-reactive protein                                            | CRP      | 1.114  | 0.4214        | 1.282  | <b>0.0334</b> | -1.151 | 0.2406        | Not expressed in heart or expressed with low tissue specificity |
| CRYZL1.9207.60.3   | O95825 | Quinone oxidoreductase-like protein 1                         | CRYZL1   | 1.081  | 0.4340        | -1.124 | 0.1761        | 1.215  | <b>0.0291</b> | Not expressed in heart or expressed with low tissue specificity |
| CSF1.3738.54.1     | P09603 | Macrophage colony-stimulating factor 1                        | CSF1     | 1.125  | 0.0661        | 1.140  | <b>0.0179</b> | -1.014 | 0.8066        | Not expressed in heart or expressed with low tissue specificity |
| CSNK2A1.3427.63.2  | P68400 | Casein kinase II subunit alpha                                | CSNK2A1  | -1.161 | <b>0.0078</b> | -1.066 | 0.1847        | -1.089 | 0.0859        | Not expressed in heart or expressed with low tissue specificity |
| CST3.2609.59.2     | P01034 | Cystatin-C                                                    | CST3     | 1.005  | 0.9530        | 1.157  | <b>0.0293</b> | -1.151 | <b>0.0401</b> | Not expressed in heart or expressed with low tissue specificity |
| CTF1.2889.37.2     | Q16619 | Cardiotrophin-1                                               | CTF1     | -1.041 | 0.2773        | -1.081 | <b>0.0146</b> | 1.039  | 0.2420        | Not expressed in heart or expressed with low tissue specificity |
| CTSD.5508.62.3     | P07339 | Cathepsin D                                                   | CTSD     | -1.070 | 0.4559        | 1.107  | 0.1965        | -1.185 | <b>0.0372</b> | Not expressed in heart or expressed with low tissue specificity |
| CTSF.9212.22.3     | Q9UBX1 | Cathepsin F                                                   | CTSF     | -1.186 | <b>0.0105</b> | -1.142 | <b>0.0208</b> | -1.038 | 0.5225        | Not expressed in heart or expressed with low tissue specificity |
| CXCL12.3516.60.2   | P48061 | Stromal cell-derived factor 1                                 | CXCL12   | 1.047  | 0.3837        | 1.097  | <b>0.0462</b> | -1.047 | 0.3335        | Not expressed in heart or expressed with low tissue specificity |
| CXCL13.3487.32.2   | O43927 | C-X-C motif chemokine 13                                      | CXCL13   | 1.294  | <b>0.0348</b> | 1.270  | <b>0.0241</b> | 1.019  | 0.8589        | Not expressed in heart or expressed with low tissue specificity |
| DCTPP1.4314.12.2   | Q9H773 | dCTP pyrophosphatase 1                                        | DCTPP1   | 1.133  | 0.0511        | 1.150  | <b>0.0119</b> | -1.015 | 0.7915        | Not expressed in heart or expressed with low tissue specificity |
| DDR1.4122.12.2     | Q08345 | Epithelial discoidin domain-containing receptor 1             | DDR1     | 1.302  | <b>0.0485</b> | 1.233  | 0.0701        | 1.056  | 0.6458        | Not expressed in heart or expressed with low tissue specificity |
| DIABLO.3122.6.2    | Q9NR28 | Diablo homolog, mitochondrial                                 | DIABLO   | 1.097  | 0.2162        | -1.039 | 0.5503        | 1.140  | <b>0.0498</b> | Not expressed in heart or expressed with low tissue specificity |
| DKK1.3535.84.1     | O94907 | Dickkopf-related protein 1                                    | DKK1     | -1.083 | 0.2610        | -1.185 | <b>0.0061</b> | 1.094  | 0.1550        | Not expressed in heart or expressed with low tissue specificity |
| DPP7.3608.12.1     | Q9UHL4 | Dipeptidyl peptidase 2                                        | DPP7     | -1.108 | <b>0.0412</b> | -1.050 | 0.2622        | -1.055 | 0.2254        | Not expressed in heart or expressed with low tissue specificity |
| DSC3.4981.6.1      | Q14574 | Desmocollin-3                                                 | DSC3     | -1.270 | <b>0.0140</b> | -1.143 | 0.1107        | -1.111 | 0.2200        | Not expressed in heart or expressed with low tissue specificity |
| EDAR.2977.7.2      | Q9UNE0 | Tumor necrosis factor receptor superfamily member EDAR        | EDAR     | -1.158 | 0.1256        | -1.205 | <b>0.0246</b> | 1.041  | 0.6354        | Not expressed in heart or expressed with low tissue specificity |
| EFEMP1.8480.29.3   | Q12805 | EGF-containing fibulin-like extracellular matrix protein 1    | EFEMP1   | -1.016 | 0.8031        | 1.108  | 0.0572        | -1.126 | <b>0.0337</b> | Not expressed in heart or expressed with low tissue specificity |
| EHMT2.5843.60.3    | Q96KQ7 | Histone-lysine N-methyltransferase EHMT2                      | EHMT2    | -1.175 | 0.0700        | -1.173 | <b>0.0388</b> | -1.002 | 0.9802        | Not expressed in heart or expressed with low tissue specificity |
| EIF4A3.4997.19.1   | P38919 | Eukaryotic initiation factor 4A-III                           | EIF4A3   | -1.190 | <b>0.0300</b> | -1.078 | 0.2785        | -1.104 | 0.1629        | Not expressed in heart or expressed with low tissue specificity |
| EIF4EBP2.4184.43.3 | Q13542 | Eukaryotic translation initiation factor 4E-binding protein 2 | EIF4EBP2 | -1.148 | <b>0.0204</b> | -1.148 | <b>0.0074</b> | 1.000  | 0.9961        | Not expressed in heart or expressed with low tissue specificity |
| EIF5.2612.5.2      | P55010 | Eukaryotic translation initiation factor 5                    | EIF5     | -1.083 | 0.2380        | 1.084  | 0.1685        | -1.174 | <b>0.0082</b> | Not expressed in heart or expressed with low tissue specificity |
| EPHA1.3431.54.2    | P21709 | Ephrin type-A receptor 1                                      | EPHA1    | 1.123  | 0.2657        | -1.089 | 0.3434        | 1.224  | <b>0.0308</b> | Not expressed in heart or expressed with low tissue specificity |
| EPO.5813.58.3      | P01588 | Erythropoietin                                                | EPO      | 1.521  | <b>0.0022</b> | 1.415  | <b>0.0033</b> | 1.075  | 0.5487        | Not expressed in heart or expressed with low tissue specificity |
| ERP29.4983.6.1     | P30040 | Endoplasmic reticulum resident protein 29                     | ERP29    | -1.206 | <b>0.0066</b> | -1.154 | <b>0.0159</b> | -1.045 | 0.4692        | Not expressed in heart or expressed with low tissue specificity |
| F3.4931.59.1       | P13726 | Tissue Factor                                                 | F3       | 1.179  | 0.0840        | 1.180  | <b>0.0451</b> | -1.001 | 0.9925        | Not expressed in heart or expressed with low tissue specificity |
| F7.3184.25.2       | P08709 | Coagulation factor VII                                        | F7       | -1.170 | <b>0.0119</b> | -1.163 | <b>0.0051</b> | -1.006 | 0.9199        | Not expressed in heart or expressed with low tissue specificity |
| F9.4876.32.1       | P00740 | Coagulation factor IX                                         | F9       | -1.136 | 0.0772        | -1.134 | <b>0.0447</b> | -1.002 | 0.9743        | Not expressed in heart or expressed with low tissue specificity |
| F9.5307.12.3       | P00740 | Coagulation factor IXab                                       | F9       | -1.155 | <b>0.0486</b> | -1.133 | <b>0.0490</b> | -1.020 | 0.7614        | Not expressed in heart or expressed with low tissue specificity |
| FABP1.11516.7.3    | P07148 | Fatty acid-binding protein, liver                             | FABP1    | 1.320  | <b>0.0203</b> | 1.173  | 0.1220        | 1.126  | 0.2635        | Not expressed in heart or expressed with low tissue specificity |
| FAM107B.4774.62.3  | Q9H098 | Protein FAM107B                                               | FAM107B  | 1.005  | 0.9419        | -1.136 | <b>0.0395</b> | 1.142  | <b>0.0374</b> | Not expressed in heart or expressed with low tissue specificity |
| FETUB.3367.8.3     | Q9UGM5 | Fetuin-B                                                      | FETUB    | -1.293 | <b>0.0221</b> | -1.378 | <b>0.0011</b> | 1.066  | 0.5217        | Not expressed in heart or expressed with low tissue specificity |
| FGF20.2763.66.2    | Q9NP95 | Fibroblast growth factor 20                                   | FGF20    | 1.233  | <b>0.0026</b> | 1.116  | 0.0662        | 1.105  | 0.1032        | Not expressed in heart or expressed with low tissue specificity |
| FGF6.4130.71.1     | P10767 | Fibroblast growth factor 6                                    | FGF6     | -1.247 | <b>0.0060</b> | -1.051 | 0.4739        | -1.187 | <b>0.0161</b> | Not expressed in heart or expressed with low tissue specificity |
| FGG.4989.7.1       | P02679 | Fibrinogen gamma chain                                        | FGG      | 1.029  | 0.4703        | 1.071  | <b>0.0468</b> | -1.041 | 0.2590        | Not expressed in heart or expressed with low tissue specificity |
| FLRT1.4547.59.2    | Q9NZU1 | Leucine-rich repeat transmembrane protein FLRT1               | FLRT1    | -1.119 | <b>0.0304</b> | -1.081 | 0.0834        | -1.035 | 0.4488        | Not expressed in heart or expressed with low tissue specificity |
| FSTL1.13112.179.3  | Q12841 | Follistatin-related protein 1                                 | FSTL1    | 1.084  | 0.1414        | 1.137  | <b>0.0074</b> | -1.049 | 0.3319        | Not expressed in heart or expressed with low tissue specificity |
| GPC6.5350.14.2     | Q9Y625 | Glypican-6                                                    | GPC6     | -1.079 | 0.0768        | -1.089 | <b>0.0219</b> | 1.009  | 0.8047        | Not expressed in heart or expressed with low tissue specificity |
| GRN.4992.49.1      | P28799 | Granulins                                                     | GRN      | 1.117  | 0.0555        | 1.177  | <b>0.0013</b> | -1.053 | 0.3154        | Not expressed in heart or expressed with low tissue specificity |
| GRP.5897.58.3      | P07492 | Gastrin-releasing peptide                                     | GRP      | -1.153 | <b>0.0078</b> | -1.060 | 0.2046        | -1.088 | 0.0757        | Not expressed in heart or expressed with low tissue specificity |
| GSN.4775.34.3      | P06396 | Gelsolin                                                      | GSN      | -1.054 | 0.2541        | -1.117 | <b>0.0060</b> | 1.060  | 0.1581        | Not expressed in heart or expressed with low tissue specificity |
| H2AFZ.4163.5.2     | POC055 | Histone H2A.z                                                 | H2AFZ    | 1.174  | 0.2082        | 1.313  | <b>0.0141</b> | -1.118 | 0.3239        | Not expressed in heart or expressed with low tissue specificity |
| HIF1A.13089.6.3    | Q16665 | Hypoxia-inducible factor 1-alpha                              | HIF1A    | 1.093  | 0.1897        | -1.041 | 0.4933        | 1.138  | <b>0.0333</b> | Not expressed in heart or expressed with low tissue specificity |
| HMGR.5230.99.3     | P04035 | 3-hydroxy-3-methylglutaryl-coenzyme A reductase               | HMGR     | 1.011  | 0.8867        | 1.137  | <b>0.0494</b> | -1.125 | 0.0798        | Not expressed in heart or expressed with low tissue specificity |
| HMGN1.9187.2.3     | P05114 | Non-histone chromosomal protein HMG-14                        | HMGN1    | -1.083 | 0.3122        | -1.177 | <b>0.0183</b> | 1.086  | 0.2415        | Not expressed in heart or expressed with low tissue specificity |
| HPX.2768.56.2      | P02790 | Hemopexin                                                     | HPX      | -1.363 | <b>0.0132</b> | -1.453 | <b>0.0006</b> | 1.066  | 0.5653        | Not expressed in heart or expressed with low tissue specificity |
| IGF1R.4232.19.2    | P08069 | Insulin-like growth factor 1 receptor                         | IGF1R    | 1.155  | <b>0.0276</b> | 1.092  | 0.1174        | 1.057  | 0.3355        | Not expressed in heart or expressed with low tissue specificity |
| IGFBP1.2771.35.2   | P08833 | Insulin-like growth factor-binding protein 1                  | IGFBP1   | 1.169  | 0.3859        | 1.410  | <b>0.0280</b> | -1.206 | 0.2412        | Not expressed in heart or expressed with low tissue specificity |
| IGFBP7.3320.49.2   | Q16270 | Insulin-like growth factor-binding protein 7                  | IGFBP7   | 1.179  | <b>0.0455</b> | 1.222  | <b>0.0051</b> | -1.036 | 0.6241        | Not expressed in heart or expressed with low tissue specificity |
| IL13.3072.4.2      | P35225 | Interleukin-13                                                | IL13     | -1.044 | 0.5180        | -1.133 | <b>0.0328</b> | 1.085  | 0.1748        | Not expressed in heart or expressed with low tissue specificity |
| IL17B.3499.77.2    | Q9UHF5 | Interleukin-17B                                               | IL17B    | -1.104 | 0.0792        | 1.034  | 0.4948        | -1.142 | <b>0.0089</b> | Not expressed in heart or expressed with low tissue specificity |
| IL17RD.3376.49.2   | Q8NFM7 | Interleukin-17 receptor D                                     | IL17RD   | 1.077  | 0.1610        | 1.154  | <b>0.0019</b> | -1.072 | 0.1414        | Not expressed in heart or expressed with low tissue specificity |

|                             |        |                                                            |           |        |               |        |               |        |               |                                                                 |
|-----------------------------|--------|------------------------------------------------------------|-----------|--------|---------------|--------|---------------|--------|---------------|-----------------------------------------------------------------|
| IL5.11071.1.3               | P05113 | Interleukin-5                                              | IL5       | 1.106  | 0.3188        | -1.085 | 0.3545        | 1.200  | <b>0.0444</b> | Not expressed in heart or expressed with low tissue specificity |
| KEAP1.8485.7.3              | Q14145 | Kelch-like ECH-associated protein 1                        | KEAP1     | 1.182  | <b>0.0220</b> | 1.131  | <b>0.0499</b> | 1.044  | 0.4999        | Not expressed in heart or expressed with low tissue specificity |
| KIR2DL4.5095.21.3           | Q99706 | Killer cell immunoglobulin-like receptor 2DL4              | KIR2DL4   | -1.102 | 0.1742        | 1.118  | 0.0713        | -1.232 | <b>0.0012</b> | Not expressed in heart or expressed with low tissue specificity |
| KIR3DS1.5097.14.3           | Q14943 | Killer cell immunoglobulin-like receptor 3DS1              | KIR3DS1   | -1.174 | <b>0.0454</b> | -1.044 | 0.5365        | -1.125 | 0.0984        | Not expressed in heart or expressed with low tissue specificity |
| KLK13.3200.49.2             | Q9UKR3 | Kallikrein-13                                              | KLK13     | -1.046 | 0.2965        | -1.089 | <b>0.0242</b> | 1.041  | 0.3029        | Not expressed in heart or expressed with low tissue specificity |
| KLK7.3378.49.2              | P49862 | Kallikrein-7                                               | KLK7      | -1.044 | 0.7041        | -1.223 | <b>0.0399</b> | 1.172  | 0.1151        | Not expressed in heart or expressed with low tissue specificity |
| KNG1.4495.33.2              | P01042 | Kininogen-1                                                | KNG1      | -1.108 | 0.0597        | -1.127 | <b>0.0112</b> | 1.017  | 0.7184        | Not expressed in heart or expressed with low tissue specificity |
| LAMA1.LAMB1.LAMC1.2728.62.2 | P25391 | Laminin                                                    | LAMA1     | -1.100 | 0.0822        | -1.120 | <b>0.0173</b> | 1.018  | 0.7106        | Not expressed in heart or expressed with low tissue specificity |
| LAYN.2635.61.2              | Q6UX15 | Layilin                                                    | LAYN      | 1.068  | 0.3303        | 1.132  | <b>0.0358</b> | -1.059 | 0.3387        | Not expressed in heart or expressed with low tissue specificity |
| LMAN2.7638.30.3             | Q12907 | Vesicular integral-membrane protein VIP36                  | LMAN2     | -1.040 | 0.5456        | -1.157 | <b>0.0099</b> | 1.113  | 0.0653        | Not expressed in heart or expressed with low tissue specificity |
| LTBP4.13133.73.3            | Q8N251 | Latent-transforming growth factor beta-binding protein 4   | LTBP4     | 1.163  | <b>0.0324</b> | 1.188  | <b>0.0048</b> | -1.022 | 0.7259        | Not expressed in heart or expressed with low tissue specificity |
| LTBR.2636.10.2              | P36941 | Tumor necrosis factor receptor superfamily member 3        | LTBR      | 1.093  | 0.0988        | -1.036 | 0.4512        | 1.132  | <b>0.0102</b> | Not expressed in heart or expressed with low tissue specificity |
| MAP2K2.3628.3.4             | P36507 | Dual specificity mitogen-activated protein kinase kinase 2 | MAP2K2    | -1.233 | <b>0.0060</b> | -1.135 | 0.0526        | -1.086 | 0.2216        | Not expressed in heart or expressed with low tissue specificity |
| MAP2K4.5242.37.3            | P45985 | Dual specificity mitogen-activated protein kinase kinase 4 | MAP2K4    | 1.032  | 0.7413        | -1.176 | <b>0.0498</b> | 1.213  | <b>0.0232</b> | Not expressed in heart or expressed with low tissue specificity |
| MDM2.4245.80.2              | Q00987 | E3 ubiquitin-protein ligase Mdm2                           | MDM2      | -1.150 | <b>0.0454</b> | -1.081 | 0.1952        | -1.064 | 0.3185        | Not expressed in heart or expressed with low tissue specificity |
| MED1.5470.69.2              | Q15648 | Mediator of RNA polymerase II transcription subunit 1      | MED1      | -1.031 | 0.6378        | -1.124 | <b>0.0386</b> | 1.090  | 0.1366        | Not expressed in heart or expressed with low tissue specificity |
| MEPE.3209.69.1              | Q9NQ76 | Matrix extracellular phosphoglycoprotein                   | MEPE      | -1.064 | 0.2698        | 1.054  | 0.2784        | -1.122 | <b>0.0226</b> | Not expressed in heart or expressed with low tissue specificity |
| MMP1.4924.32.1              | P03956 | Interstitial collagenase                                   | MMP1      | 1.234  | 0.1068        | 1.286  | <b>0.0260</b> | -1.043 | 0.7187        | Not expressed in heart or expressed with low tissue specificity |
| MSTN.14583.49.3             | Q14793 | Growth/differentiation factor 8                            | MSTN      | -1.092 | 0.4358        | -1.214 | <b>0.0479</b> | 1.112  | 0.2915        | Not expressed in heart or expressed with low tissue specificity |
| MYBPC1.7648.9.3             | Q00872 | Myosin-binding protein C, slow-type                        | MYBPC1    | -1.242 | 0.1810        | -1.341 | <b>0.0369</b> | 1.080  | 0.5935        | Not expressed in heart or expressed with low tissue specificity |
| NCR2.2734.49.4              | O95944 | Natural cytotoxicity triggering receptor 2                 | NCR2      | -1.130 | <b>0.0041</b> | -1.112 | <b>0.0039</b> | -1.016 | 0.6701        | Not expressed in heart or expressed with low tissue specificity |
| NOTCH3.5108.72.3            | Q9UM47 | Neurogenic locus notch homolog protein 3                   | NOTCH3    | 1.017  | 0.7400        | 1.102  | <b>0.0334</b> | -1.083 | 0.0891        | Not expressed in heart or expressed with low tissue specificity |
| NRP1.5542.22.2              | Q14786 | Neuropilin-1                                               | NRP1      | 1.117  | <b>0.0425</b> | 1.162  | <b>0.0016</b> | -1.040 | 0.4108        | Not expressed in heart or expressed with low tissue specificity |
| NXPH1.4562.1.2              | P58417 | Neurexophilin-1                                            | NXPH1     | -1.070 | 0.3516        | -1.155 | <b>0.0231</b> | 1.079  | 0.2407        | Not expressed in heart or expressed with low tissue specificity |
| PAFAH1B2.2642.4.1           | P68402 | Platelet-activating factor acetylhydrolase IB subunit beta | PAFAH1B2  | -1.141 | <b>0.0181</b> | -1.035 | 0.4762        | -1.102 | <b>0.0487</b> | Not expressed in heart or expressed with low tissue specificity |
| PCSK7.4459.68.2             | Q16549 | Proprotein convertase subtilisin/kexin type 7              | PCSK7     | 1.111  | 0.0984        | -1.009 | 0.8665        | 1.122  | <b>0.0439</b> | Not expressed in heart or expressed with low tissue specificity |
| PES1.4267.81.3              | O00541 | Pescadillo homolog                                         | PES1      | -1.248 | <b>0.0416</b> | -1.004 | 0.9688        | -1.244 | <b>0.0246</b> | Not expressed in heart or expressed with low tissue specificity |
| PGK1.5020.50.1              | P00558 | Phosphoglycerate kinase 1                                  | PGK1      | 1.067  | 0.3606        | -1.062 | 0.3260        | 1.133  | <b>0.0485</b> | Not expressed in heart or expressed with low tissue specificity |
| PIGR.3216.2.2               | P01833 | Polymetric immunoglobulin receptor                         | PIGR      | 1.284  | <b>0.0165</b> | 1.245  | <b>0.0149</b> | 1.031  | 0.7407        | Not expressed in heart or expressed with low tissue specificity |
| PLA2G10.2949.6.2            | O15496 | Group 10 secretory phospholipase A2                        | PLA2G10   | -1.103 | <b>0.0428</b> | -1.066 | 0.1286        | -1.035 | 0.4202        | Not expressed in heart or expressed with low tissue specificity |
| PLA2G1B.4910.21.1           | P04054 | Phospholipase A2                                           | PLA2G1B   | 1.207  | <b>0.0358</b> | 1.166  | <b>0.0470</b> | 1.035  | 0.6661        | Not expressed in heart or expressed with low tissue specificity |
| PLG.3710.49.2               | P00747 | Angiostatin                                                | PLG       | -1.015 | 0.8235        | -1.169 | <b>0.0076</b> | 1.152  | <b>0.0188</b> | Not expressed in heart or expressed with low tissue specificity |
| PLG.4151.6.2                | P00747 | Plasminogen                                                | PLG       | -1.068 | 0.1969        | -1.147 | <b>0.0022</b> | 1.073  | 0.1196        | Not expressed in heart or expressed with low tissue specificity |
| POSTN.3457.57.1             | Q15063 | Periostin                                                  | POSTN     | 1.190  | <b>0.0295</b> | 1.144  | 0.0517        | 1.040  | 0.5753        | Not expressed in heart or expressed with low tissue specificity |
| PRDX5.5017.19.1             | P30044 | Peroxiredoxin-5, mitochondrial                             | PRDX5     | -1.099 | <b>0.0390</b> | -1.076 | 0.0619        | -1.021 | 0.6108        | Not expressed in heart or expressed with low tissue specificity |
| PROC.2961.1.2               | P04070 | Vitamin K-dependent protein C                              | PROC      | -1.305 | <b>0.0002</b> | -1.234 | <b>0.0006</b> | -1.057 | 0.3687        | Not expressed in heart or expressed with low tissue specificity |
| PRSS1.3049.61.2             | P07477 | Trypsin-1                                                  | PRSS1     | 1.262  | <b>0.0210</b> | 1.279  | <b>0.0049</b> | -1.014 | 0.8771        | Not expressed in heart or expressed with low tissue specificity |
| PRSS2.5034.79.1             | P07478 | Trypsin-2                                                  | PRSS2     | 1.204  | 0.1787        | 1.614  | <b>0.0001</b> | -1.340 | <b>0.0181</b> | Not expressed in heart or expressed with low tissue specificity |
| PRSS3.3479.71.2             | P35030 | Trypsin-3                                                  | PRSS3     | -1.056 | 0.4264        | -1.171 | <b>0.0077</b> | 1.110  | 0.0866        | Not expressed in heart or expressed with low tissue specificity |
| PTK2.4986.59.1              | Q05397 | Focal adhesion kinase 1                                    | PTK2      | -1.245 | <b>0.0360</b> | -1.044 | 0.6335        | -1.193 | 0.0578        | Not expressed in heart or expressed with low tissue specificity |
| REG1A.13095.51.3            | P05451 | Lithostathine-1-alpha                                      | REG1A     | 1.095  | 0.4258        | 1.231  | <b>0.0360</b> | -1.124 | 0.2491        | Not expressed in heart or expressed with low tissue specificity |
| SCARB2.5100.53.3            | Q14108 | Lysosome membrane protein 2                                | SCARB2    | -1.182 | <b>0.0500</b> | -1.117 | 0.1323        | -1.058 | 0.4557        | Not expressed in heart or expressed with low tissue specificity |
| SCGB2A1.5001.6.2            | O75556 | Mammaglobin-B                                              | SCGB2A1   | -1.033 | 0.3740        | -1.070 | <b>0.0325</b> | 1.036  | 0.2758        | Not expressed in heart or expressed with low tissue specificity |
| SELP.4154.57.2              | P16109 | P-selectin                                                 | SELP      | -1.043 | 0.4490        | -1.106 | <b>0.0375</b> | 1.060  | 0.2380        | Not expressed in heart or expressed with low tissue specificity |
| SERPINA10.13119.26.3        | Q9UK55 | Protein Z-dependent protease inhibitor                     | SERPINA10 | -1.185 | <b>0.0254</b> | -1.251 | <b>0.0007</b> | 1.056  | 0.4161        | Not expressed in heart or expressed with low tissue specificity |
| SERPINA4.3449.58.2          | P29622 | Kallistatin                                                | SERPINA4  | -1.024 | 0.6518        | -1.102 | <b>0.0353</b> | 1.076  | 0.1221        | Not expressed in heart or expressed with low tissue specificity |
| SERPIND1.3316.58.1          | P05546 | Heparin cofactor 2                                         | SERPIND1  | -1.113 | 0.0876        | -1.180 | <b>0.0026</b> | 1.059  | 0.3012        | Not expressed in heart or expressed with low tissue specificity |
| SH2D1A.4567.82.2            | O60880 | SH2 domain-containing protein 1A                           | SH2D1A    | 1.072  | 0.4089        | 1.174  | <b>0.0295</b> | -1.094 | 0.2306        | Not expressed in heart or expressed with low tissue specificity |
| SOD2.5008.51.1              | P04179 | Superoxide dismutase [Mn], mitochondrial                   | SOD2      | 1.036  | 0.5513        | -1.080 | 0.1372        | 1.119  | <b>0.0353</b> | Not expressed in heart or expressed with low tissue specificity |
| SSRP1.5032.64.1             | Q08945 | FACT complex subunit SSRP1                                 | SSRP1     | -1.237 | <b>0.0483</b> | -1.110 | 0.2606        | -1.114 | 0.2572        | Not expressed in heart or expressed with low tissue specificity |
| SST.5957.30.3               | P61278 | Somatostatin-28                                            | SST       | -1.082 | 0.0630        | -1.080 | <b>0.0364</b> | -1.002 | 0.9578        | Not expressed in heart or expressed with low tissue specificity |
| TACSTD2.2619.72.2           | P09758 | Tumor-associated calcium signal transducer 2               | TACSTD2   | -1.152 | <b>0.0024</b> | -1.076 | 0.0652        | -1.070 | 0.0981        | Not expressed in heart or expressed with low tissue specificity |
| TBK1.3400.49.2              | Q9UHD2 | Serine/threonine-protein kinase TBK1                       | TBK1      | -1.084 | 0.0840        | 1.013  | 0.7464        | -1.098 | <b>0.0247</b> | Not expressed in heart or expressed with low tissue specificity |
| TDGF1.5810.25.3             | P13385 | Teratocarcinoma-derived growth factor 1                    | TDGF1     | 1.533  | <b>0.0307</b> | 1.418  | <b>0.0410</b> | 1.081  | 0.6554        | Not expressed in heart or expressed with low tissue specificity |
| TFF1.9185.15.3              | P04155 | Trefoil factor 1                                           | TFF1      | 1.242  | 0.0829        | 1.265  | <b>0.0297</b> | -1.019 | 0.8649        | Not expressed in heart or expressed with low tissue specificity |

|                      |        |                                                                        |           |        |               |        |               |        |               |                                                                 |
|----------------------|--------|------------------------------------------------------------------------|-----------|--------|---------------|--------|---------------|--------|---------------|-----------------------------------------------------------------|
| TGFBI.3283.21.1      | Q15582 | Transforming growth factor-beta-induced protein ig-h3                  | TGFBI     | 1.145  | <b>0.0380</b> | 1.103  | 0.0815        | 1.038  | 0.5194        | Not expressed in heart or expressed with low tissue specificity |
| TLR4.111101.18.3     | O00206 | Toll-like receptor 4                                                   | TLR4      | 1.251  | 0.0533        | -1.037 | 0.7175        | 1.297  | <b>0.0121</b> | Not expressed in heart or expressed with low tissue specificity |
| TNFRSF10D.14121.24.3 | Q9UBN6 | Tumor necrosis factor receptor superfamily member 10D                  | TNFRSF10D | 1.108  | <b>0.0421</b> | 1.115  | <b>0.0124</b> | -1.007 | 0.8768        | Not expressed in heart or expressed with low tissue specificity |
| TYK2.5260.80.3       | P29597 | Non-receptor tyrosine-protein kinase TYK2                              | TYK2      | -1.279 | <b>0.0037</b> | -1.159 | <b>0.0425</b> | -1.103 | 0.1881        | Not expressed in heart or expressed with low tissue specificity |
| VEGFA.2597.8.3       | P15692 | Vascular endothelial growth factor A                                   | VEGFA     | 1.136  | <b>0.0087</b> | 1.107  | <b>0.0154</b> | 1.026  | 0.5466        | Not expressed in heart or expressed with low tissue specificity |
| WFIKKN1.3191.50.2    | Q96NZ8 | WAP, kazal, immunoglobulin, kunitz and NTR domain-containing protein 1 | WFIKKN1   | -1.125 | 0.1728        | -1.190 | <b>0.0203</b> | 1.058  | 0.4617        | Not expressed in heart or expressed with low tissue specificity |
| ZNRF3.14122.132.3    | Q9ULT6 | E3 ubiquitin-protein ligase ZNRF3                                      | ZNRF3     | -1.307 | <b>0.0230</b> | -1.110 | 0.3048        | -1.178 | 0.1168        | Not expressed in heart or expressed with low tissue specificity |

Journal Pre-proof
